# Supplementary material
Source: PubMed Central journal article supplement (PMC3522759)

# Appendix 1. Algorithm used to identify cases with craniofacial microsomia (CFM)

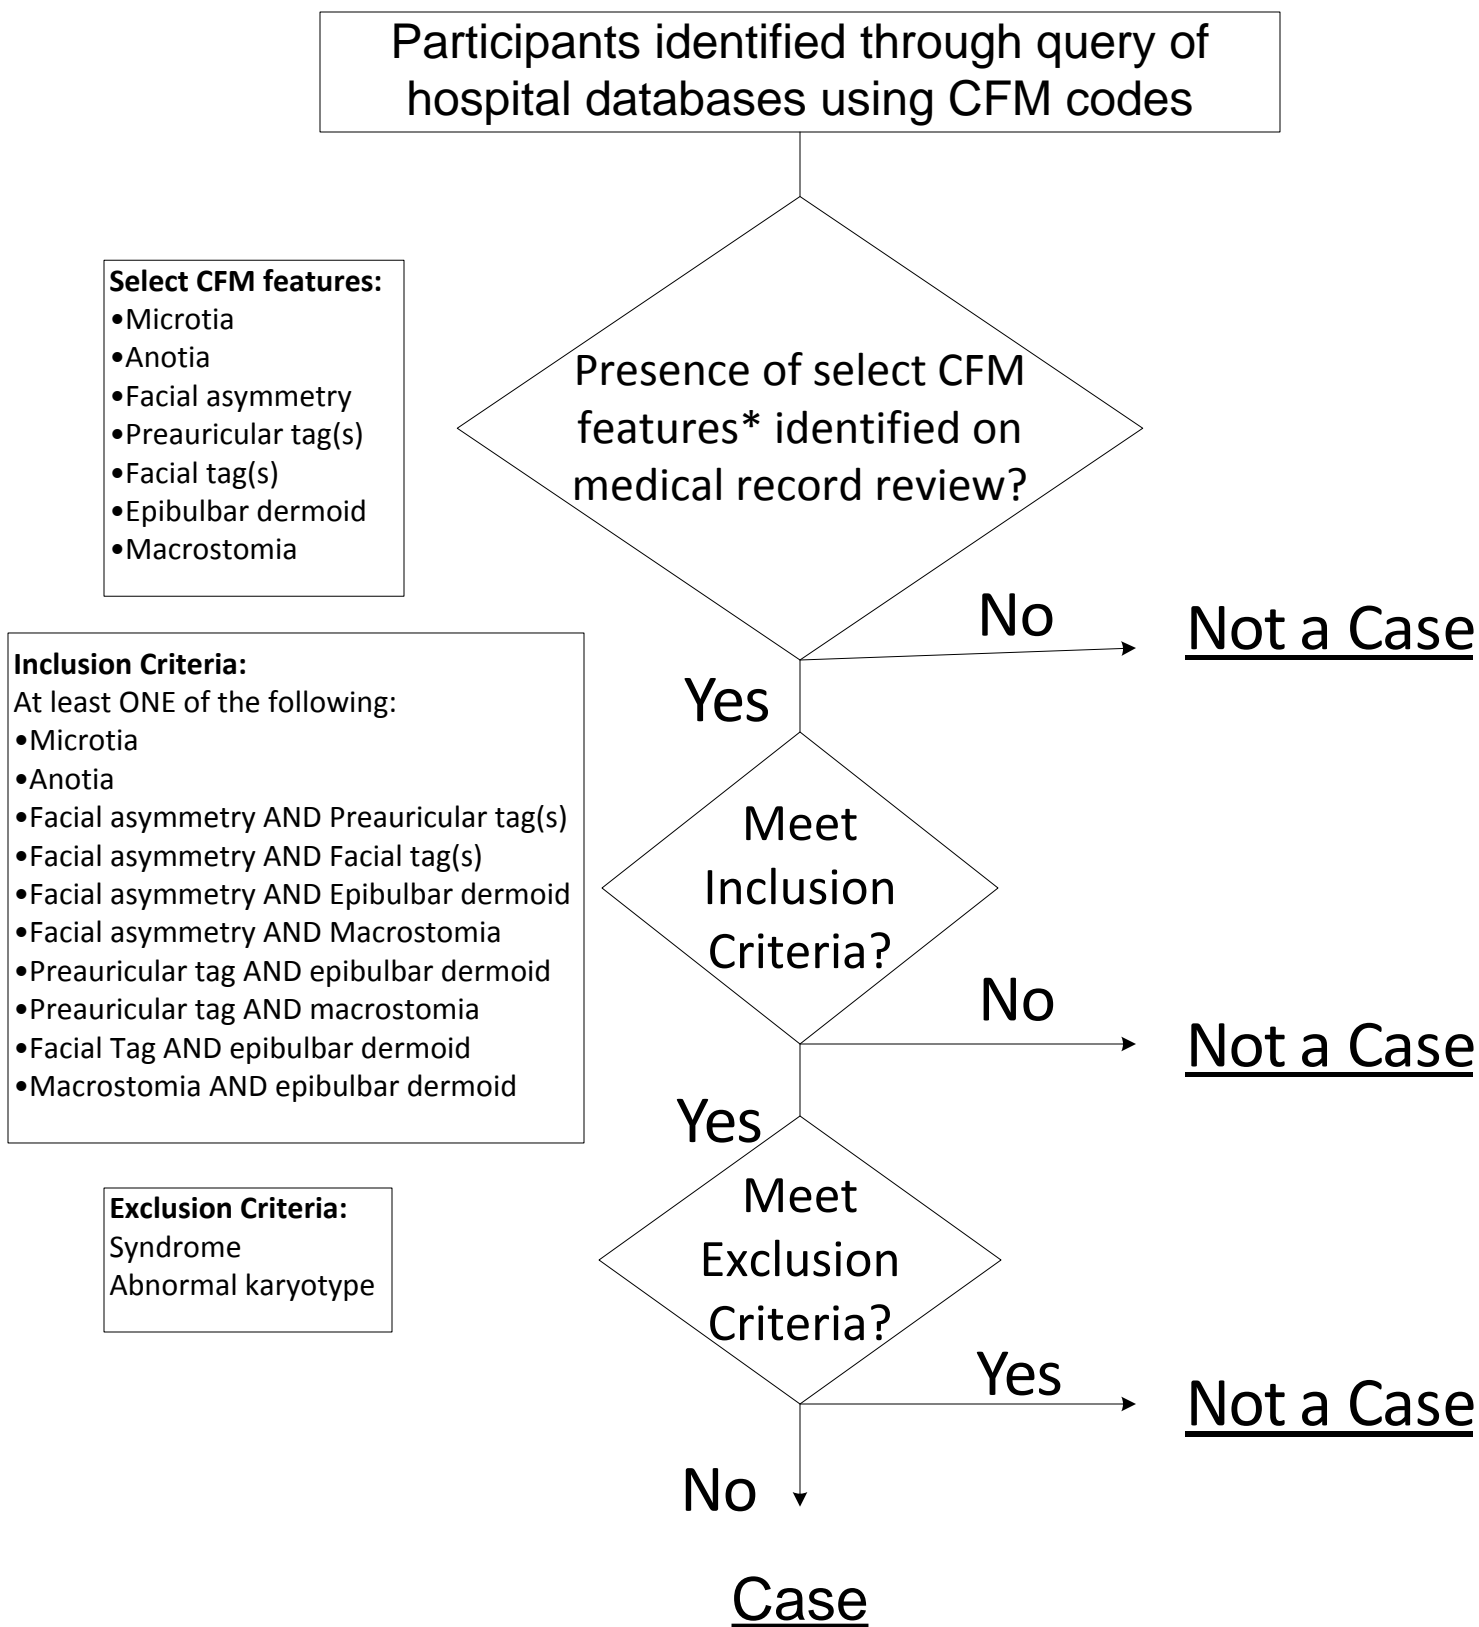

Supplement: NIHMS415389-supplement-Appendix_01.pdf [file NIHMS415389-supplement-Appendix_01.pdf]
